# Supplementary material for: Purification of functional human ES and iPSC-derived midbrain dopaminergic progenitors using LRTM1
Source: PubMed Central journal article supplement (PMC5067526; doi:10.1038/ncomms13097), 2016-10-14
Supplement: ncomms13097-s1.pdf [file ncomms13097-s1.pdf]

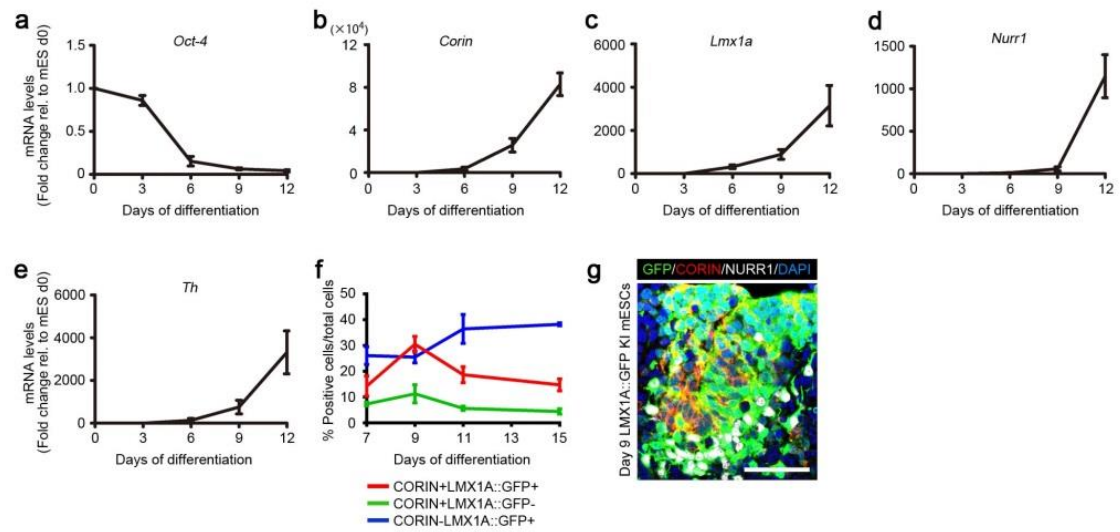

**Supplementary Figure 1 Induction of DA neurons by the SFEBq method. (a-e)**

Gene expression analysis for pluripotent (*Oct-4*; **a**), floor plate (*Corin*; **b**), DA progenitor (*Lmx1a* and *Nurr1*; **c,d**) and DA neuron (*Th*; **e**) markers by quantitative RT-PCR ( $n = 4$ ). **(f)** Temporal protein expression of CORIN and LMX1A::GFP ( $n = 3$ ). Error bars indicate s.e.m. **(g)** Immunofluorescence image of LMX1A KI mouse ESCs for DAPI (blue), LMX1A::GFP (green), CORIN (red) and NURR1 (white) on day 9. Scale bar, 50  $\mu$ m.

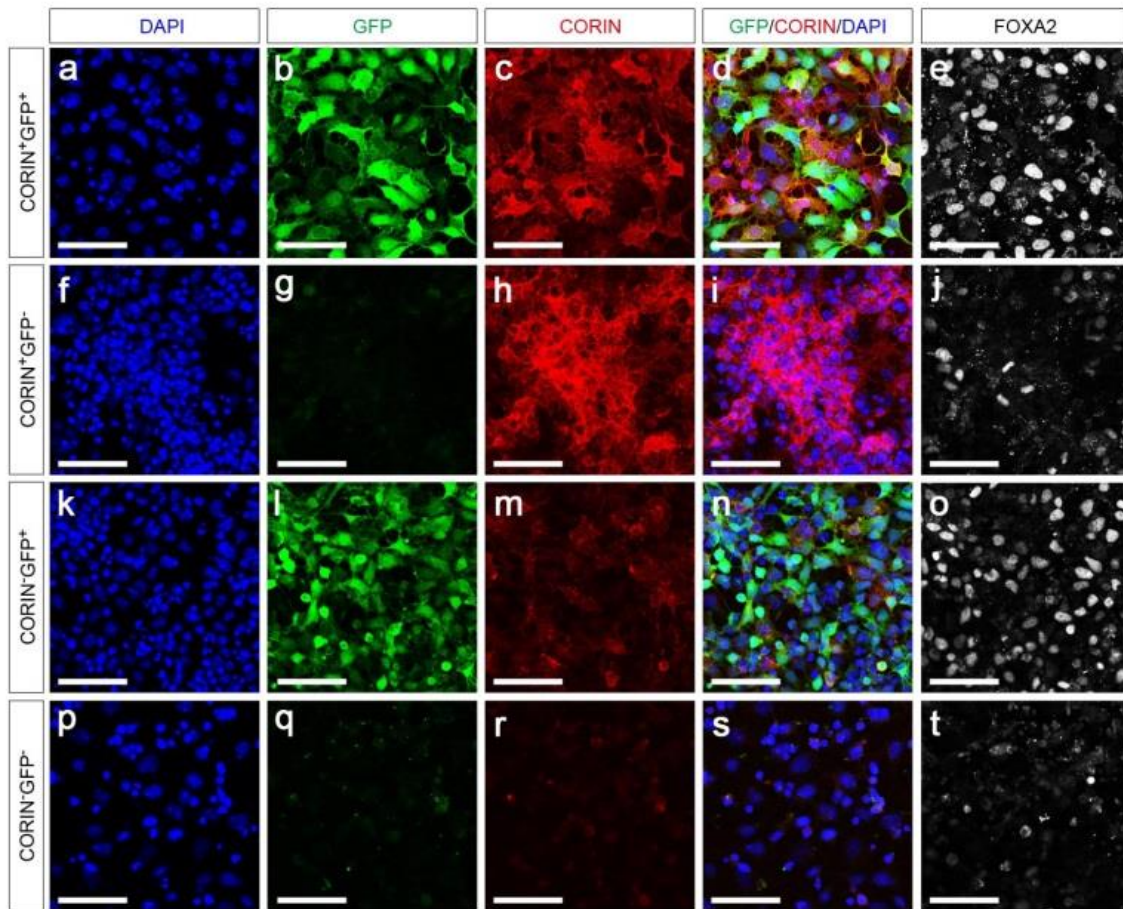

**Supplementary Figure 2 Purification of DA progenitors by co-expression of CORIN and LMX1A::GFP. (a-t)** Immunofluorescence images of sorted cells on day 9 for DAPI (blue), LMX1A::GFP (green), CORIN (red) and FOXA2 (white). Scale bars, 50  $\mu$ m.

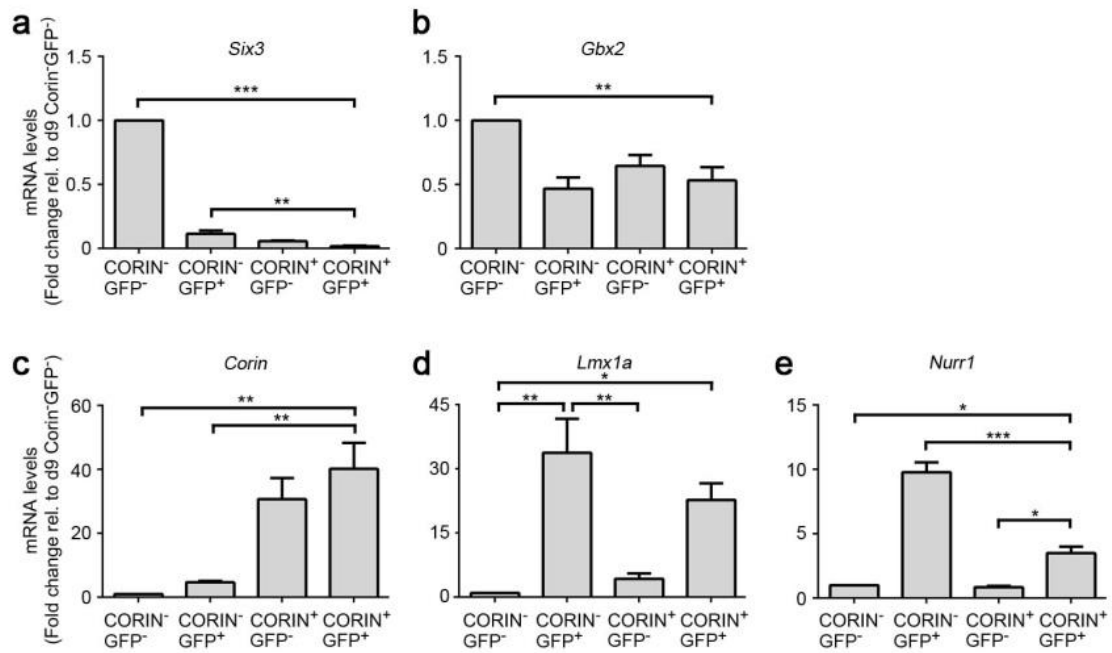

**Supplementary Figure 3 Gene expression analysis of FACS-purified cells.** Gene expression analysis of the sorted cells for forebrain (*Six3*; **a**), hindbrain (*Gbx2*; **b**), floor plate (*Corin*; **c**) and DA progenitor (*Lmx1a* and *Nurr1*; **d,e**) markers on day 9 by quantitative RT-PCR ( $n = 4$ ). Asterisks indicate statistical significance as determined by a one-way ANOVA with Bonferroni's multiple comparison test; \*,  $P < 0.05$ , \*\*,  $P < 0.01$  and \*\*\*,  $P < 0.001$ . Error bars indicate s.e.m.

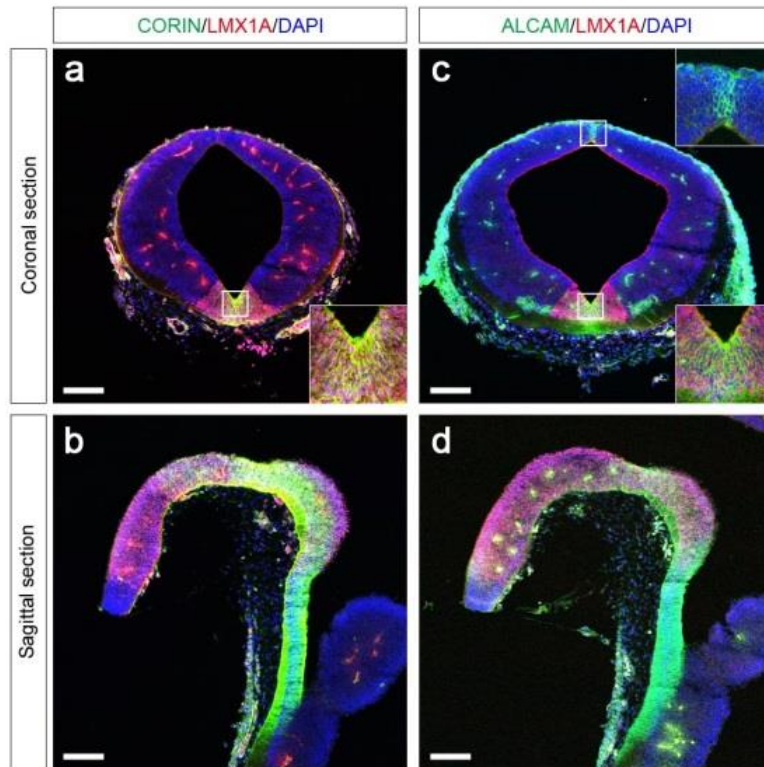

**Supplementary Figure 4 CORIN and ALCAM expression in developing mouse brain.** (a-d) Immunohistochemical images of E11.5 fetal mouse brain for CORIN (green), ALCAM (green), LMX1A (red) and DAPI (blue) in the coronal section (a,c) and in the sagittal section (b,d). Insets indicate magnified images of CORIN<sup>+</sup> or ALCAM<sup>+</sup> cells. Scale bars, 100  $\mu$ m.

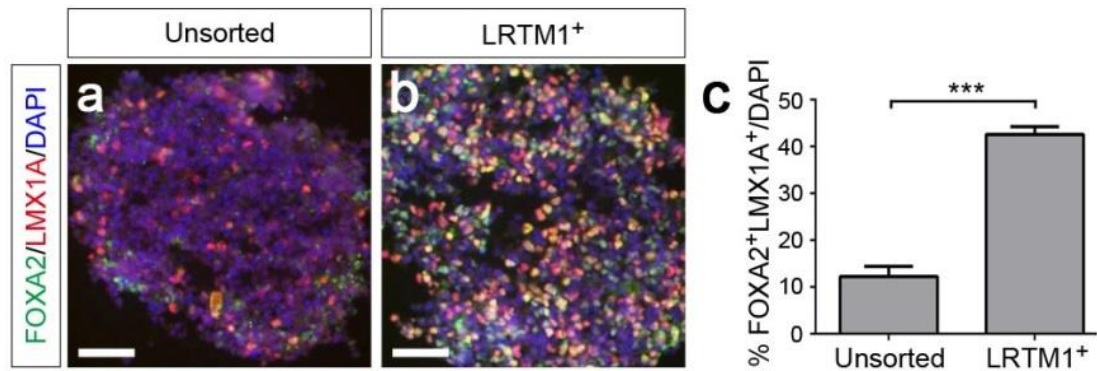

**Supplementary Figure 5 Purification of mDA progenitors from fetal mouse VM**

**using LRTM1. (a,b)** Immunofluorescence images of E11.5 fetal mouse VM-derived

unsorted cells (a) and LRTM1<sup>+</sup> cells (b) for FOXA2 (green), LMX1A (red) and DAPI

(blue). (c) Quantification of FOXA2<sup>+</sup>LMX1A<sup>+</sup> cells in unsorted cells vs. LRTM1<sup>+</sup> cells

(*n* = 4). Asterisks indicate statistical significance as determined by student's *t*-test; \*\*\*, *P*

< 0.001. Scale bars, 50 μm. Error bars indicate s.e.m.

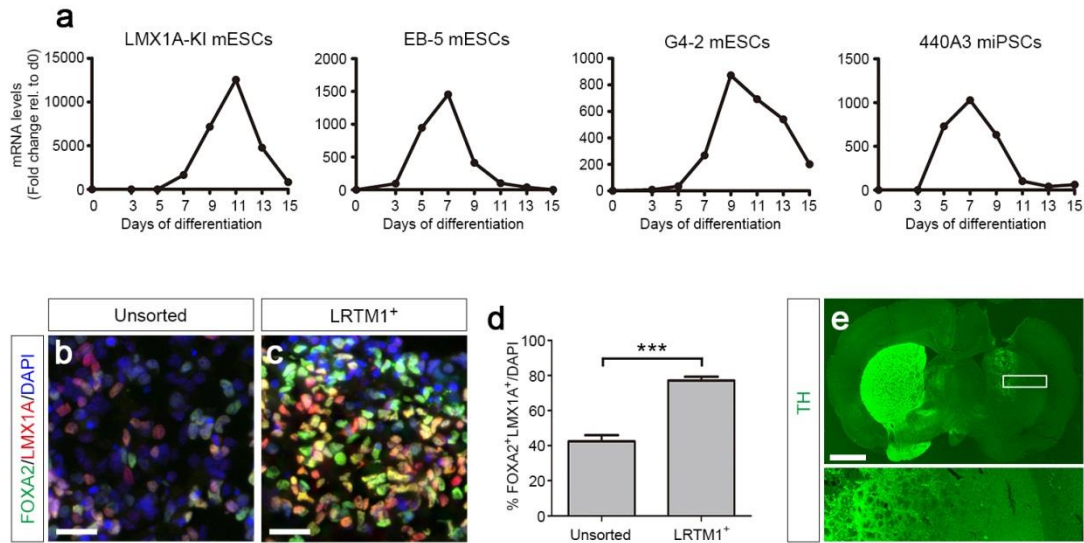

**Supplementary Figure 6 Purification of mDA progenitors from mouse iPSCs using**

**LRTM1.** (a) Gene expression analysis of mouse ESC lines (LMX1A::GFP, EB5, G4-2)

and iPSC line (440A3) for *Lrtm1* by quantitative RT-PCR. (b,c) Immunofluorescence

images of spheres derived from unsorted cells and LRTM1<sup>+</sup> cells for FOXA2 (green),

LMX1A (red) and DAPI (blue) on day 9. Scale bars 100  $\mu$ m. (d) Quantification of

FOXA2<sup>+</sup>LMX1A<sup>+</sup> cells in unsorted cells ( $n = 6$ ) versus LRTM1<sup>+</sup> cells ( $n = 5$ ). Asterisks

indicate statistical significance as determined by student's *t*-test, \*\*\*,  $P < 0.001$ . Error

bars indicate s.e.m. (e) Immunohistochemical image of mouse iPSC-derived LRTM1<sup>+</sup>

graft for TH (green) ( $n = 3$ ). Scale bars, 2 mm.

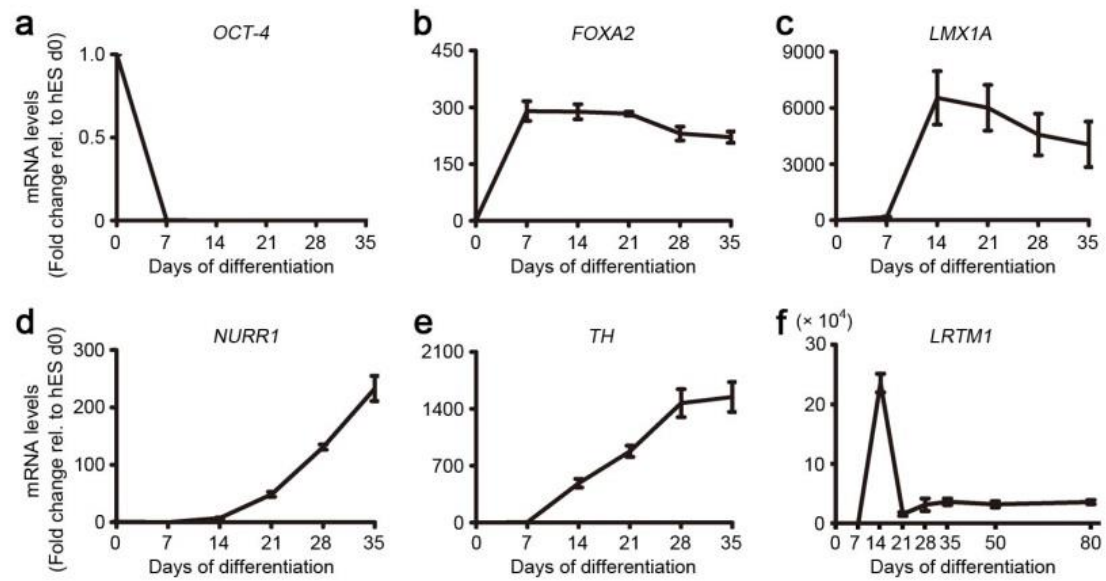

**Supplementary Figure 7 Induction of DA neurons from human ESCs by adhesive culture.** (a-e) Gene expression analysis for pluripotent (*OCT-4*; a), floor plate (*FOXA2*; b), DA progenitor (*LMX1A* and *NURR1*; c,d) and DA neuron (*TH*; e) markers by quantitative RT-PCR ( $n = 4$ ). (f) *LRTM1* mRNA expression showed a peak at 14 days after differentiation ( $n = 3$ ). Error bars indicate s.e.m.

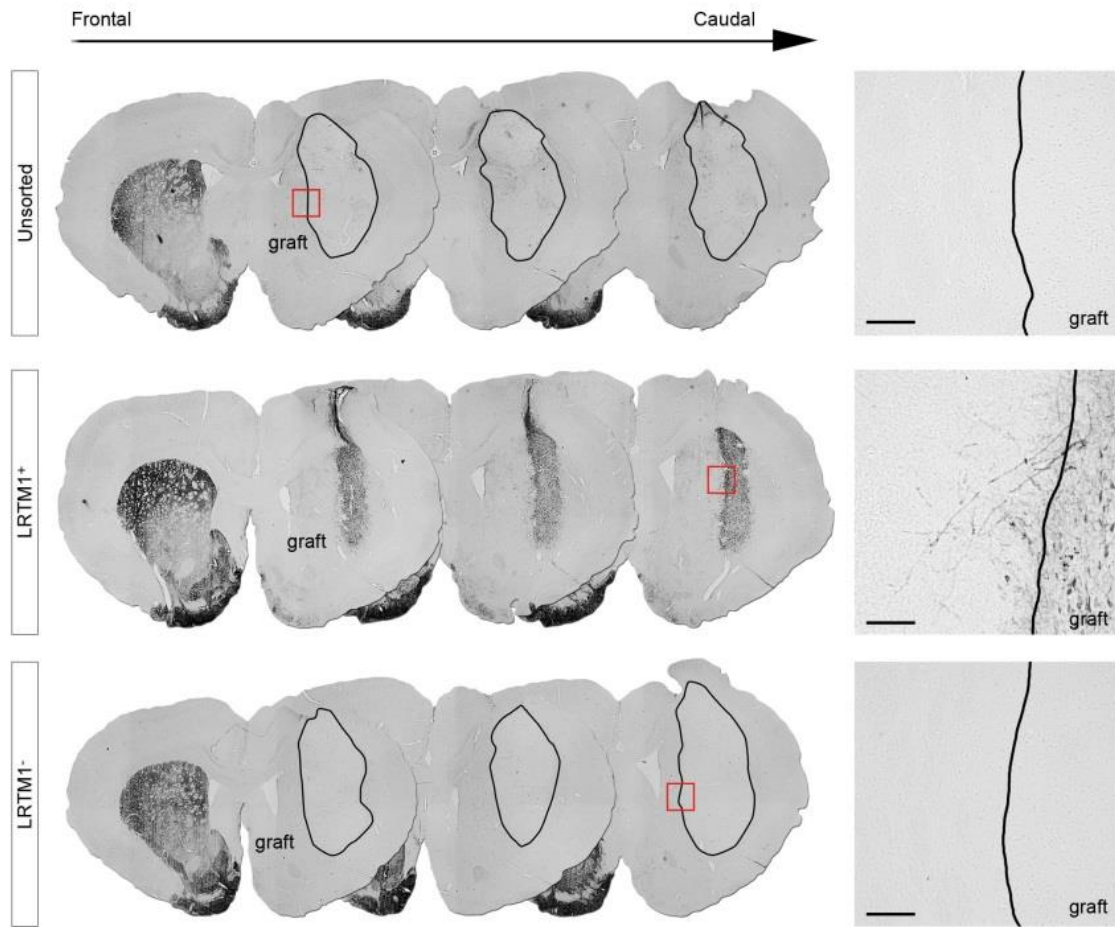

**Supplementary Figure 8** In vivo survival of FACS sorted human iPSCs. TH-DAB staining of the sequential brain slices transplanted with unsorted cells, LRTM1<sup>+</sup> cells and LRTM1<sup>-</sup> cells at 12 weeks after transplantation. The outline indicates grafts from unsorted cells and LRTM1<sup>-</sup> cells. Red squares indicate magnified images of the grafts. Scale bars, 100 μm.



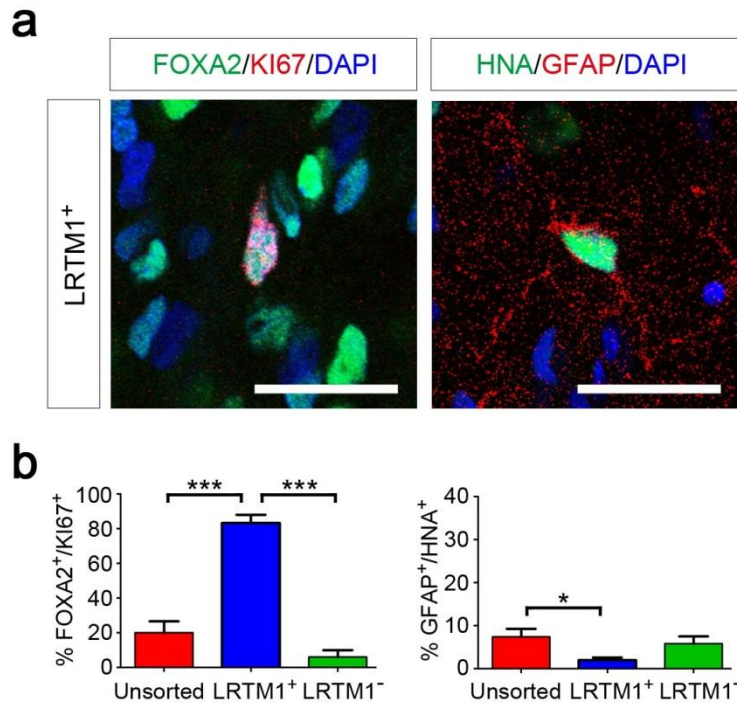

**Supplementary Figure 9 Donor-derived DA progenitors and astrocytes in the graft at 12 weeks after transplantation.** (a) Immunohistochemical images of the graft derived from unsorted cells, LRTM1<sup>+</sup> cells and LRTM1<sup>-</sup> cells for FOXA2 (green), HNA (green), KI67 (red), GFAP (red) and DAPI (blue) at 12 weeks. Scale bar, 25  $\mu$ m. (b) Quantification of FOXA2<sup>+</sup> cells per KI67<sup>+</sup> cells and GFAP<sup>+</sup> cells per HNA<sup>+</sup> surviving human cells in unsorted cells ( $n = 7$ ) vs. LRTM1<sup>+</sup> cells ( $n = 12$ ) vs. LRTM1<sup>-</sup> cells ( $n = 5$ ). Asterisks indicate statistical significances as determined by a one-way ANOVA with Bonferroni's multiple comparison test; \*,  $P < 0.05$ , and \*\*\*,  $P < 0.001$ . Error bars indicate s.e.m.

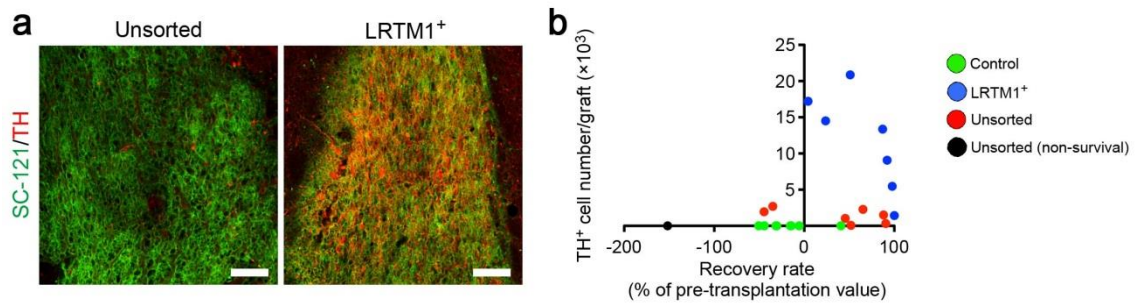

**Supplementary Figure 10 In vivo study of human iPSC-derived DA neurons. (a)**

Immunohistochemical images of the graft derived from unsorted cells and LRTM1<sup>+</sup> cells for SC-121 (green) and TH (red) at 16 weeks. Scale bar, 100  $\mu\text{m}$ . **(b)** Correlation

between the TH<sup>+</sup> cell number and the recovery rate (pre- vs. 16 weeks post-transplantation) in a methamphetamine-induced rotational analysis. control:  $n = 8$ ;

LRTM1<sup>+</sup> cells:  $n = 7$ ; unsorted cells:  $n = 7$ .

**Supplementary Table 1 Lists of primers for semi-quantitative RT-PCR (S) and quantitative RT-PCR (Q).**

| Gene name      | Types of primer | Forward primer            | Reverse primer           |
|----------------|-----------------|---------------------------|--------------------------|
| <i>mCorin</i>  | S               | GAGGCTGCAAAGAAGGATG       | TGTACAAGGGCAGGGAAAAG     |
|                | Q               | CCCTTCTGTGCTCCAAGCAAGACTG | AGAGCACTGCCACGGCCACC     |
| <i>mGapdh</i>  | S               | GCAGTGGCAAAGTGGAGATT      | ATGTAGGCCATGAGGTCCAC     |
|                | Q               | CCGCCTGGAGAAACCTGCCAAGT   | GGGAGTTGCTGTTGAAGTCGCAGG |
| <i>mLrtm1</i>  | S               | ACCCTTGGATTTGTGACTGC      | CCTTGGTACTGGGCTGTGAT     |
|                | Q               | TGTTGAATGAGGGTTTGTGCT     | TCCACGGAGTTTGATGATGG     |
| <i>mAnxa2</i>  | Q               | CATTCTACACCCCAAGTGC       | CAGCTTTCGGAAGTCTCCAG     |
| <i>mFolr1</i>  | Q               | GGCCCTGAGGACAATTTACA      | CCCAGAGCAGCACTAAGGAC     |
| <i>mOtx2</i>   | Q               | CTCGACGTTCTGGAAGCTCT      | CTGGGTGGAAAGAGAAGCTG     |
| <i>mTacr1</i>  | Q               | GTGCAACCTACCTGGCAAAT      | TGACCTTGACACGCTGCTC      |
| <i>mTm4sf1</i> | Q               | GCTGCGGCTACGAAACTAC       | GCCTCCAAGCATTCCATTTA     |
| <i>mGbx2</i>   | Q               | GCAAGGGAAAGACGAGTCAAA     | GGCAAATTGTCATCTGAGCTGTA  |
| <i>mLmx1a</i>  | Q               | GTCCCAGAACCATCCTGACC      | GGAACCACACCTGAACCACA     |
| <i>mNestin</i> | Q               | CAGCAACTGGCACACCTCAA      | GCCAAGAGAAGCCTGGGAAC     |
| <i>mNurr1</i>  | Q               | GGCTCCCTTCACAACCTCCA      | AGAGTGACAGGCGGGAGACA     |
| <i>mOct3/4</i> | Q               | AGATCACTCACATCGCCAATC     | GGAAAGGTGTCCCTGTAGCC     |
| <i>mPax7</i>   | Q               | GTGGAATCAGAACCCGACCTC     | GTAGTGGTCTCTCGAAGGC      |
| <i>mSix3</i>   | Q               | CCGGAAGAGTTGTCCATGTTC     | CGACTCGTGTGTTGATGGC      |
| <i>mTh</i>     | Q               | CAGTGCCAGAGAGGACAAGG      | AGGTCCAGGTCAGGGTCAAA     |
| <i>hFOXA2</i>  | Q               | TTCAGGCCCGGCTAACTCT       | AGTCTCGACCCCACTTGCT      |
| <i>hGAPDH</i>  | Q               | ATGGGGAAGGTGAAGGTCG       | TAAAAGCAGCCCTGGTGACC     |

|                |   |                        |                        |
|----------------|---|------------------------|------------------------|
| <i>hLMX1A</i>  | Q | TGCCTGGAGACCACATGCA    | TCGCTATCCAGGTCATGGAAA  |
| <i>hLRTM1</i>  | Q | ATTGCCACTTGCTCGGTCTT   | TCCTTTCCCTTCCAGGTGTCT  |
| <i>hNURR1</i>  | Q | CGAAACCGAAGAGCCCACAGGA | GGTCATAGCCGGGTTGGAGTCG |
| <i>hOCT3/4</i> | Q | AGACCATCTGCCGCTTTGAG   | GCAAGGGCCGCAGCTT       |
| <i>hTH</i>     | Q | GCAGTTCTCGCAGGACATTG   | CGGCACCATAGGCCTTCA     |

**Supplementary Table 2 List of Antibodies and Dilutions, Related to Experimental Procedures.**

| Protein                    | Species | Company                        | Dilution |
|----------------------------|---------|--------------------------------|----------|
| ALCAM                      | Goat    | R&D Systems                    | 1:200    |
| CALBINDIN                  | Mouse   | Swant Swiss Antibodies         | 1:1,000  |
| CORIN                      | Mouse   | Donated by the KAN laboratory  | 1:200    |
| DAT                        | Rat     | Abcam                          | 1:200    |
| FOXA2                      | Goat    | R&D Systems                    | 1:500    |
| GFP                        | Rabbit  | MBL Co., LTD.                  | 1:1,000  |
| GIRK2                      | Rabbit  | Alomone Labs                   | 1:200    |
| Ki67                       | Rabbit  | Novocastra                     | 1:1,000  |
| LMX1A                      | Hamster | Donated by the KAN laboratory  | 1:200    |
| Lrtm1                      | Rat     | Donated by the KAN laboratory  | 1:20     |
| HNA                        | Mouse   | Merck Millipore                | 1:1,000  |
| NURR1                      | Rabbit  | Santa Cruz Biotechnology, Inc. | 1:200    |
| NURR1                      | Rat     | Donated by the KAN laboratory  | 1:1,000  |
| PAX6                       | Mouse   | BD Biosciences                 | 1:200    |
| PITX3                      | Rabbit  | Merck Millipore                | 1:200    |
| SOX1                       | Goat    | R&D Systems                    | 1:100    |
| STEM121                    | Mouse   | StemCells, Inc.                | 1:1,000  |
| TH                         | Rabbit  | Merck Millipore                | 1:1,000  |
| TH                         | Sheep   | Merck Millipore                | 1:1,000  |
| TUJ1 (also known as Tubb3) | Mouse   | Covance                        | 1:2,000  |
